# Supplementary material
Source: publisher site journal article supplement (https://www.dovepress.com/article/479975)
Supplement: Supplementary file 1 [file get_supplementary_file.php]

**Supplementary Online Content**

**Supplementary Tables**

Table S1. Correlation matrix of the network in the NDS group

Table S2. Correlation matrix of the network in the DS group

Table S3. Comparison of node strength between DS and NDS groups

**Supplementary Figures**

Fig. S1. Heat map of correlation matrix in the NDS and DS groups

Fig. S2. Bootstrapped 95% confidence intervals (CI) for the estimated edge weights in the networks

Fig. S3. Case-dropping bootstrap for the networks

Fig. S4. Bootstrapped difference tests of edge weights in the networks

Fig. S5. Bootstrapped difference tests of strength centrality in the networks

**Table S1. Correlation matrix of the network in the NDS group**

|  | PHQ-9 | Soc | Phy | Sap | Scp | AUDIT | HSI | IACC | AFL | WE | PL | GAD-7 | ISI |
| --- | --- | --- | --- | --- | --- | --- | --- | --- | --- | --- | --- | --- | --- |
| PHQ-9 |  | 0.00 | 0.00 | 0.00 | 0.00 | –0.07 | –0.03 | 0.00 | 0.00 | 0.04 | 0.04 | 0.35 | 0.21 |
| Soc | 0.00 |  | 0.82 | –0.03 | –0.01 | 0.01 | 0.02 | 0.00 | 0.00 | –0.02 | 0.00 | 0.01 | 0.05 |
| Phy | 0.00 | **0.82** |  | 0.00 | –0.02 | 0.00 | 0.03 | 0.10 | 0.04 | 0.00 | 0.00 | 0.00 | 0.01 |
| Sap | 0.00 | –0.03 | 0.00 |  | 0.89 | 0.00 | –0.04 | 0.00 | 0.00 | 0.11 | 0.00 | –0.02 | 0.00 |
| Scp | 0.00 | –0.01 | –0.02 | **0.89** |  | 0.00 | 0.00 | 0.00 | 0.00 | 0.00 | 0.03 | 0.00 | 0.00 |
| AUDIT | –0.07 | 0.01 | 0.00 | 0.00 | 0.00 |  | 0.15 | 0.01 | 0.00 | 0.00 | 0.00 | 0.01 | 0.04 |
| HSI | –0.03 | 0.02 | 0.03 | –0.04 | 0.00 | 0.15 |  | 0.00 | 0.00 | 0.00 | 0.00 | 0.00 | –0.04 |
| IACC | 0.00 | 0.00 | 0.10 | 0.00 | 0.00 | 0.01 | 0.00 |  | 0.31 | 0.00 | 0.24 | 0.05 | 0.00 |
| AFL | 0.00 | 0.00 | 0.04 | 0.00 | 0.00 | 0.00 | 0.00 | 0.31 |  | **0.47** | 0.15 | 0.11 | 0.00 |
| WE | 0.04 | –0.02 | 0.00 | 0.11 | 0.00 | 0.00 | 0.00 | 0.00 | 0.47 |  | 0.43 | 0.00 | 0.05 |
| PL | 0.04 | 0.00 | 0.00 | 0.00 | 0.03 | 0.00 | 0.00 | 0.24 | 0.15 | 0.43 |  | 0.03 | 0.00 |
| GAD-7 | 0.35 | 0.01 | 0.00 | –0.02 | 0.00 | 0.01 | 0.00 | 0.05 | 0.11 | 0.00 | 0.03 |  | 0.06 |
| ISI | 0.21 | 0.05 | 0.01 | 0.00 | 0.00 | 0.04 | –0.04 | 0.00 | 0.00 | 0.05 | 0.00 | 0.06 |  |

The names of the nodes ('PHQ-9', 'Soc', 'Phy', 'Sap', 'Scp', 'AUDIT', 'HSI', 'IACC', 'AFL', 'WE', 'PL', 'GAD-7', 'ISI') are 'PHQ-9 score', 'Social anhedonia', 'Physical anhedonia', 'Social anticipatory pleasure', 'Social consummatory pleasure', 'Smoking severity', 'AUDIT score', 'Inability to Control Craving', 'Anxiety and Feeling Lost', 'Withdrawal and Escape', 'Productivity Loss', 'GAD score', 'Help-seeking' and 'ISI score'. PHQ-9, the 9-item Patient Health Questionnaire. GAD-7, the 7-item Generalized Anxiety Disorder Scale. ISI, Insomnia Severity Index. HSI, Heaviness of Smoking Index. AUDIT, Alcohol Use Disorders Identification Test, the same as below. The top three positive edge weights list in bold font.

**Table S2. Correlation matrix of the network in the DS group**

|  | PHQ-9 | Soc | Phy | Sap | Scp | AUDIT | HSI | IACC | AFL | WE | PL | GAD-7 | ISI |
| --- | --- | --- | --- | --- | --- | --- | --- | --- | --- | --- | --- | --- | --- |
| PHQ-9 |  | 0.04 | 0.02 | –0.04 | 0.00 | 0.07 | 0.03 | 0.09 | 0.00 | 0.00 | 0.00 | **0.49** | 0.29 |
| Soc | 0.04 |  | **0.81** | –0.04 | 0.00 | 0.05 | 0.00 | 0.05 | –0.03 | –0.01 | –0.01 | 0.01 | 0.00 |
| Phy | 0.02 | 0.81 |  | 0.00 | 0.00 | 0.00 | 0.00 | 0.01 | 0.00 | –0.01 | –0.01 | 0.01 | 0.04 |
| Sap | –0.04 | –0.04 | 0.00 |  | 0.88 | –0.03 | 0.00 | –0.01 | 0.00 | 0.04 | 0.00 | –0.01 | 0.03 |
| Scp | 0.00 | 0.00 | 0.00 | **0.88** |  | 0.00 | –0.02 | 0.00 | 0.02 | 0.03 | 0.04 | 0.00 | 0.00 |
| AUDIT | 0.07 | 0.05 | 0.00 | –0.03 | 0.00 |  | 0.22 | 0.06 | 0.00 | 0.00 | –0.04 | 0.00 | 0.04 |
| HSI | 0.03 | 0.00 | 0.00 | 0.00 | –0.02 | 0.22 |  | 0.00 | 0.01 | 0.00 | –0.03 | 0.04 | –0.04 |
| IACC | 0.09 | 0.05 | 0.01 | –0.01 | 0.00 | 0.06 | 0.00 |  | 0.39 | 0.04 | 0.14 | 0.08 | 0.00 |
| AFL | 0.00 | –0.03 | 0.00 | 0.00 | 0.02 | 0.00 | 0.01 | 0.39 |  | 0.28 | 0.26 | 0.03 | 0.00 |
| WE | 0.00 | –0.01 | –0.01 | 0.04 | 0.03 | 0.00 | 0.00 | 0.04 | 0.28 |  | 0.48 | 0.06 | 0.00 |
| PL | 0.00 | –0.01 | –0.01 | 0.00 | 0.04 | –0.04 | –0.03 | 0.14 | 0.26 | 0.48 |  | 0.00 | –0.02 |
| GAD-7 | 0.49 | 0.01 | 0.01 | –0.01 | 0.00 | 0.00 | 0.04 | 0.08 | 0.03 | 0.06 | 0.00 |  | 0.07 |
| ISI | 0.29 | 0.00 | 0.04 | 0.03 | 0.00 | 0.04 | –0.04 | 0.00 | 0.00 | 0.00 | –0.02 | 0.07 |  |

The names of the nodes ('PHQ-9', 'Soc', 'Phy', 'Sap', 'Scp', 'AUDIT', 'HSI', 'IACC', 'AFL', 'WE', 'PL', 'GAD-7', 'ISI') are 'PHQ-9 score', 'Social anhedonia', 'Physical anhedonia', 'Social anticipatory pleasure', 'Social consummatory pleasure', 'Smoking severity', 'AUDIT score', 'Inability to Control Craving', 'Anxiety and Feeling Lost', 'Withdrawal and Escape', 'Productivity Loss', 'GAD score', 'Help-seeking' and 'ISI score'. PHQ-9, the 9-item Patient Health Questionnaire. GAD-7, the 7-item Generalized Anxiety Disorder Scale. ISI, Insomnia Severity Index. HSI, Heaviness of Smoking Index. AUDIT, Alcohol Use Disorders Identification Test, the same as below. The top three positive edge weights list in bold font.

**Table S3. Comparison of node strength between DS and NDS groups**

| Item | PHQ-9 | Soc | Phy | Sap | Scp | AUDIT | HSI | IACC | AFL | WE | PL | GAD-7 | ISI |
| --- | --- | --- | --- | --- | --- | --- | --- | --- | --- | --- | --- | --- | --- |
| DS | 0.86 | 0.77 | 0.19 | 0.98 | 0.50 | –1.47 | –2.01 | 0.08 | 0.64 | 0.37 | 0.72 | –0.19 | –1.45 |
| NDS | –0.21 | 0.57 | 0.79 | 1.03 | 0.54 | –1.70 | –1.67 | –0.24 | 0.99 | 1.11 | 0.43 | –0.53 | –1.11 |
| *p* | 0.00 | 0.23 | 0.12 | 0.91 | 0.45 | 0.05 | 0.43 | 0.07 | 0.43 | 0.06 | 0.11 | 0.04 | 0.57 |

Results of permutation test are presented in p value (uncorrected).

**Supplementary Figures**

**
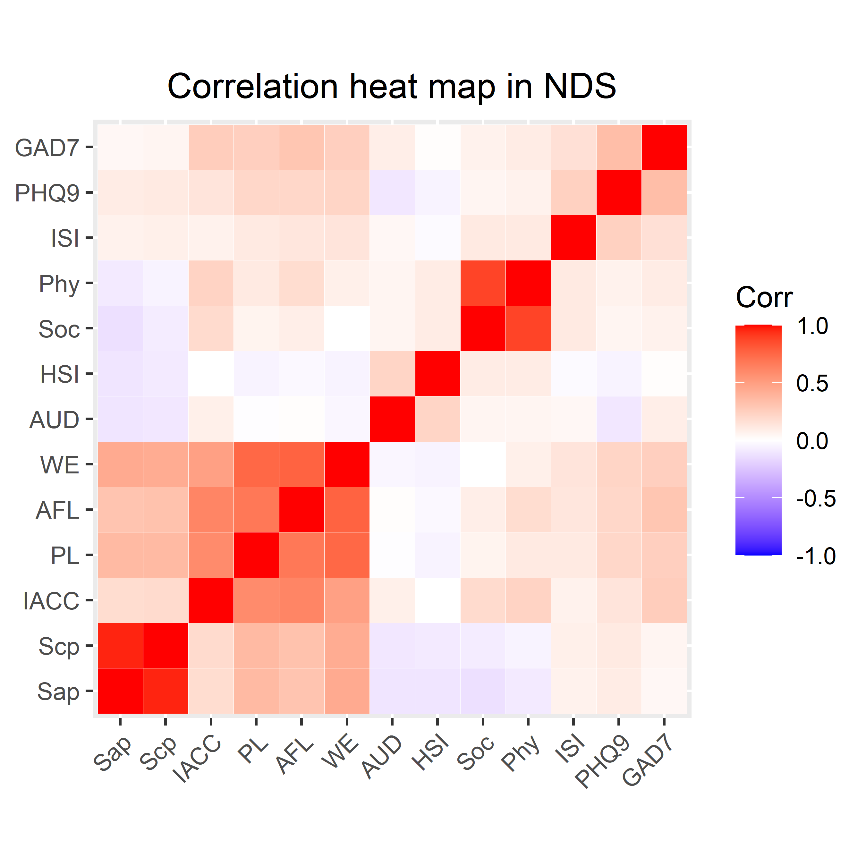
**

A

B

**
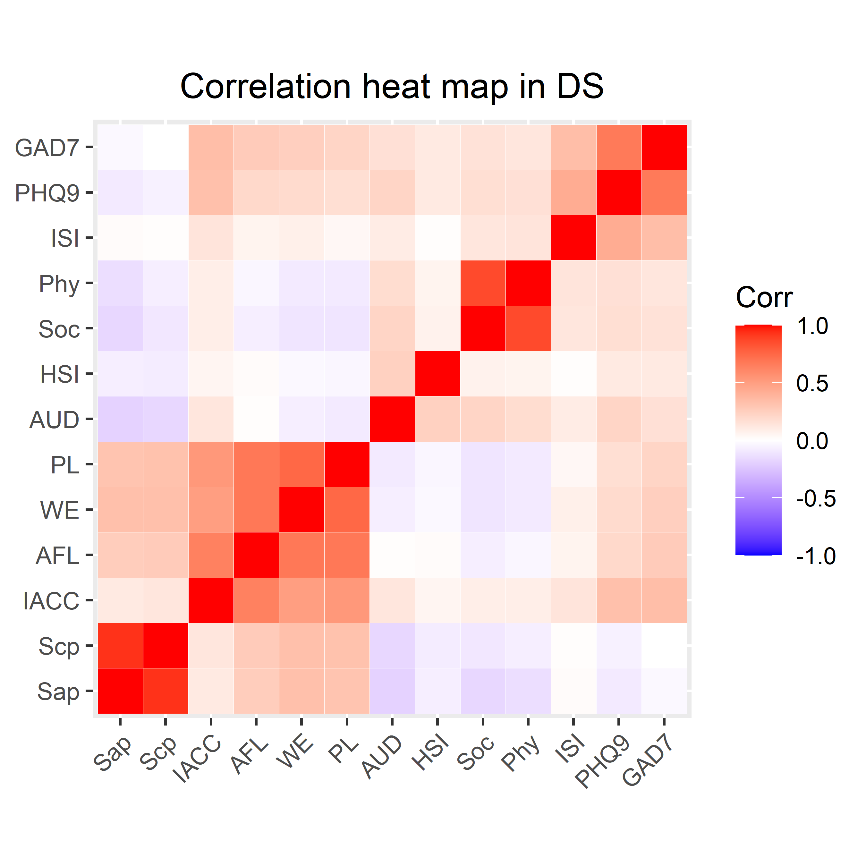
**

**Fig. S1. Heat map of correlation matrix in the NDS and DS groups**

(A) The non-depressive symptom (NDS) group. (B) The depressive symptom (DS) group. Heat map of Pearson correlation coefficients (*r* values) between each two variables.

**
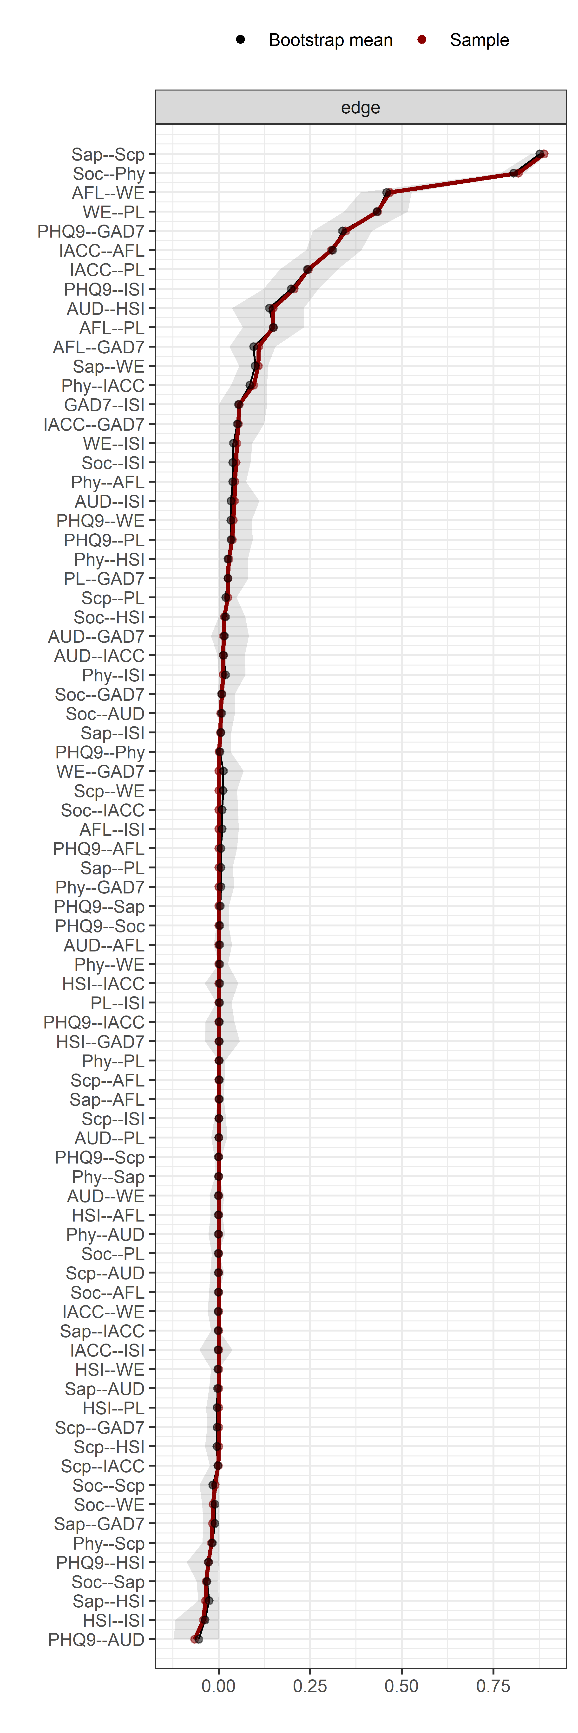

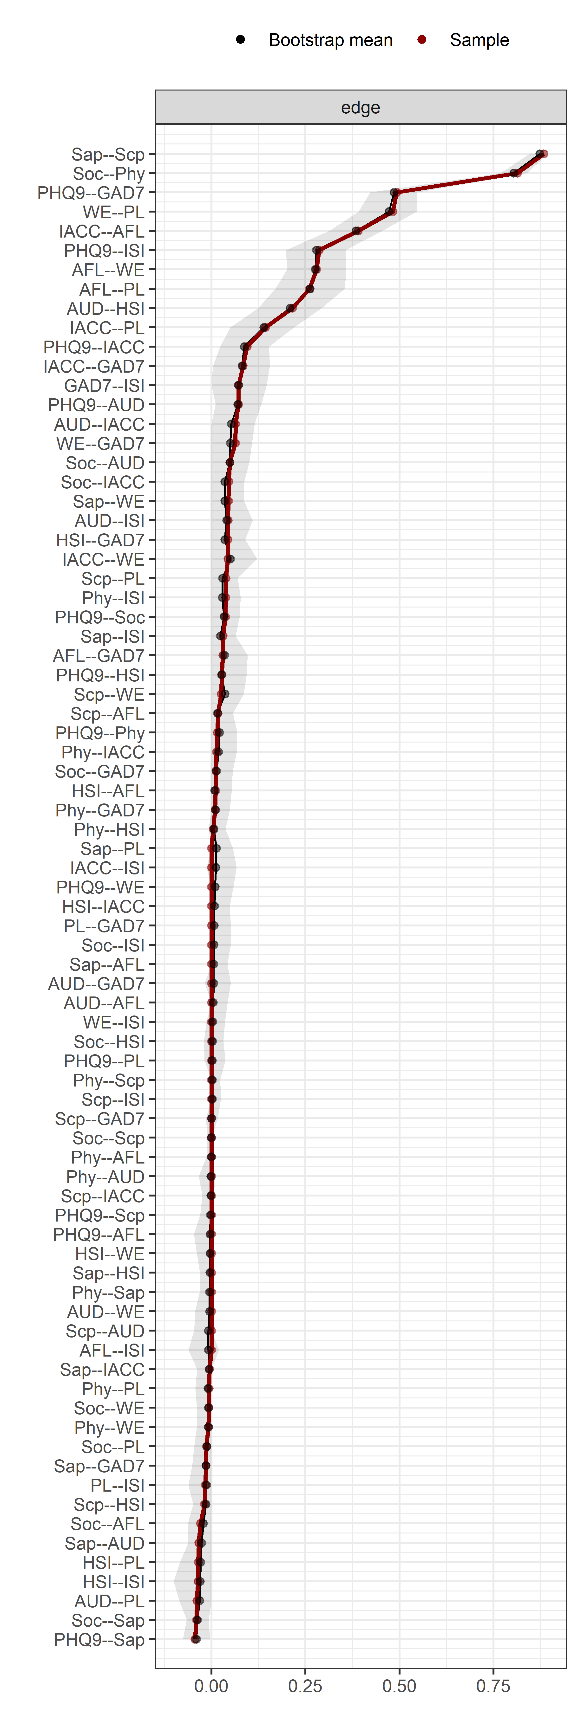

Fig. S2. Bootstrapped 95% confidence intervals (CI) for the estimated edge weights in the networks**

A

B

(A) The non-depressive symptom (NDS) group. (B) The depressive symptom (DS) group. The red line indicates the sample values and the gray area the bootstrapped CIs. Each horizontal line represents one edge of the network, ordered from the edge with the highest edge-weight to the edge with the lowest edge-weight.


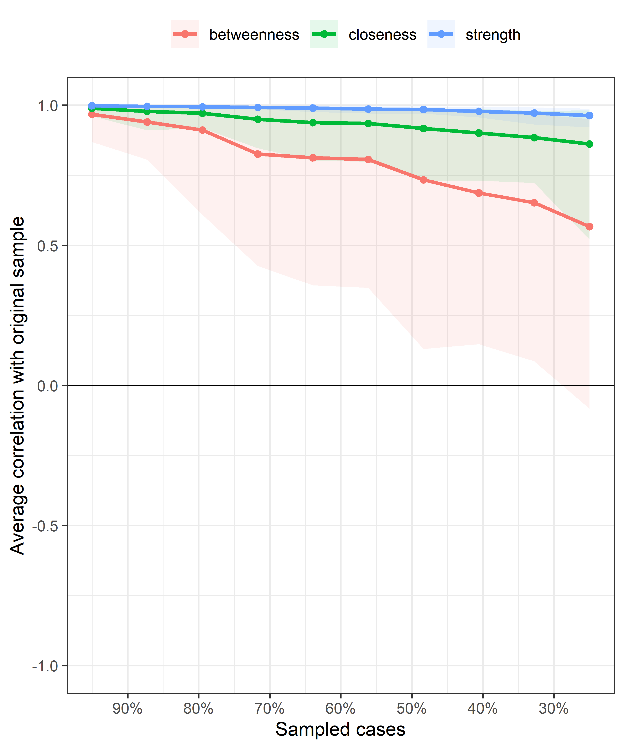

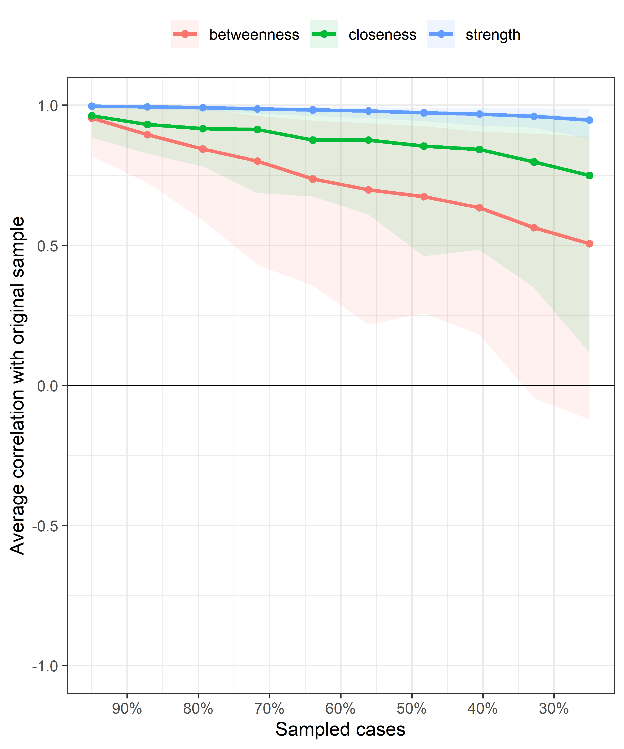


B

A

**Fig. S3. Case-dropping bootstrap for the networks**

(A) The non-depressive symptom (NDS) group. (B) The depressive symptom (DS) group. Average correlations between the centrality measures estimated with the full sample and the centrality measures estimated with smaller samples. Full line indicates the mean correlation while the colored area indicates the 2.5th quartile to the 97.5th quartile range.


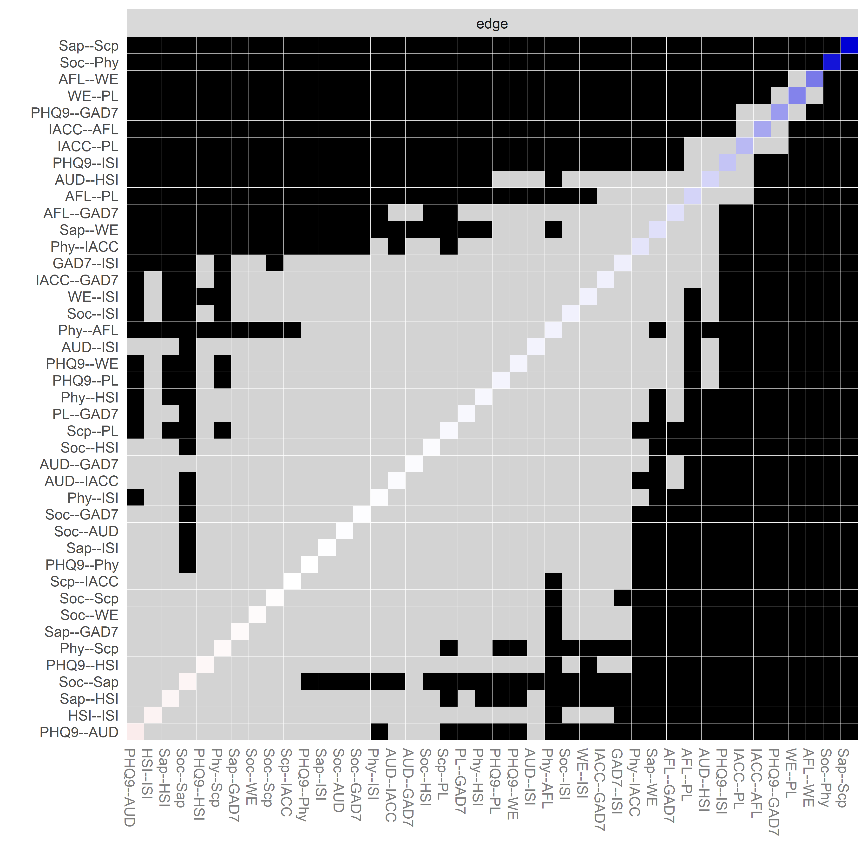


A


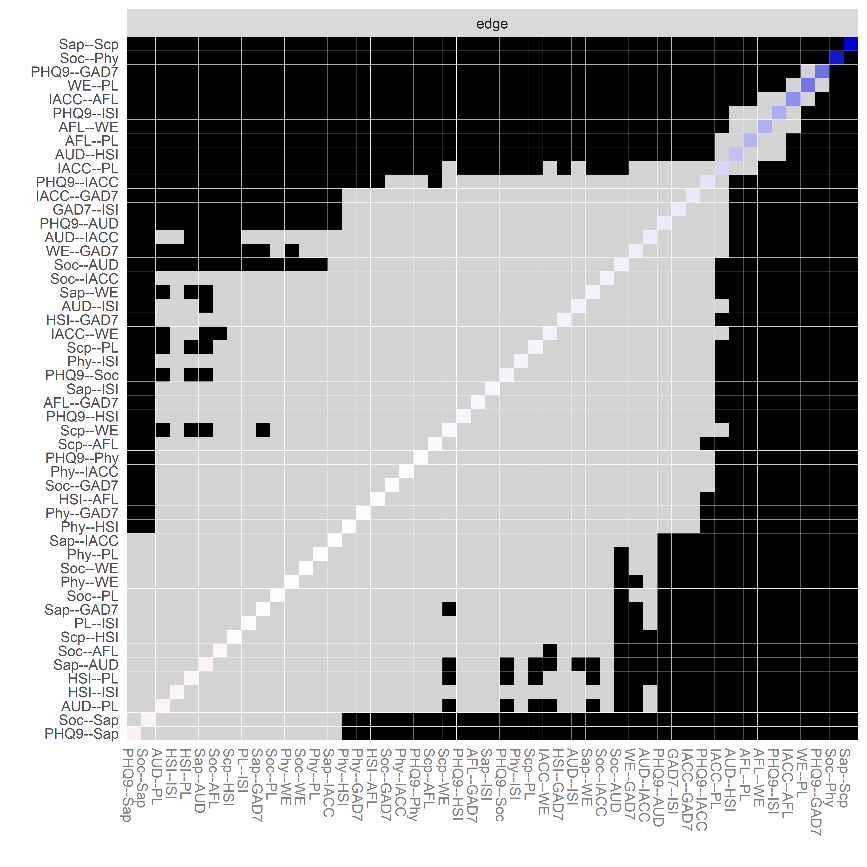


B

**Fig. S4. Bootstrapped difference tests of edge weights in the networks**

(A) The non-depressive symptom (NDS) group. (B) The depressive symptom (DS) group. Black boxes indicate a significant difference between two edges (alpha = 0.05). Grey boxes indicate no significant difference.

A


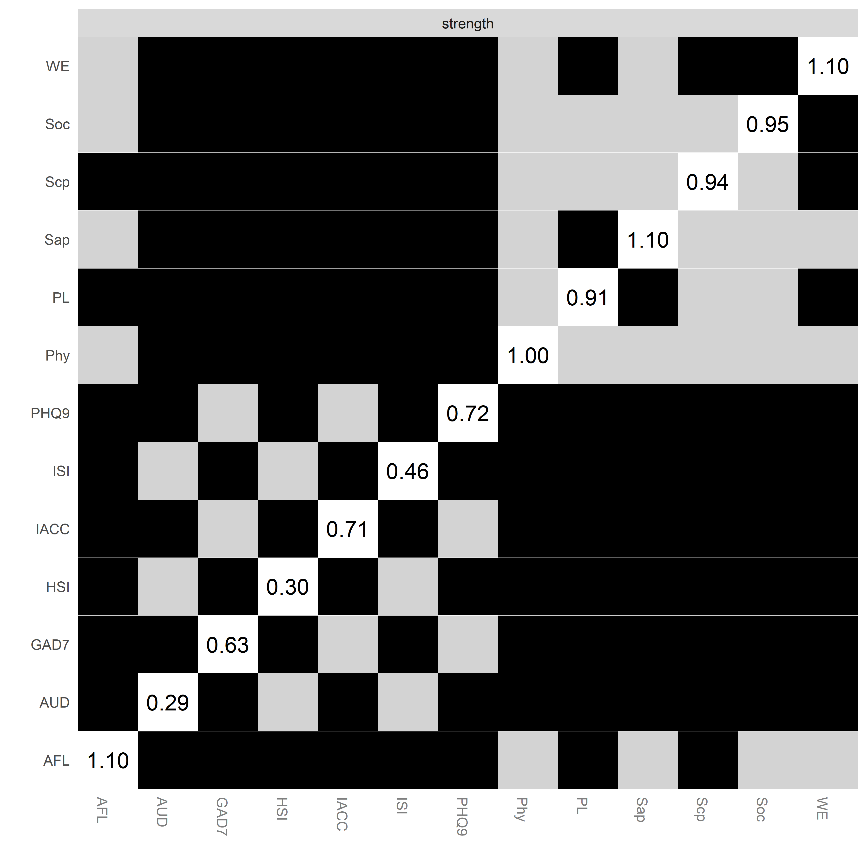


**
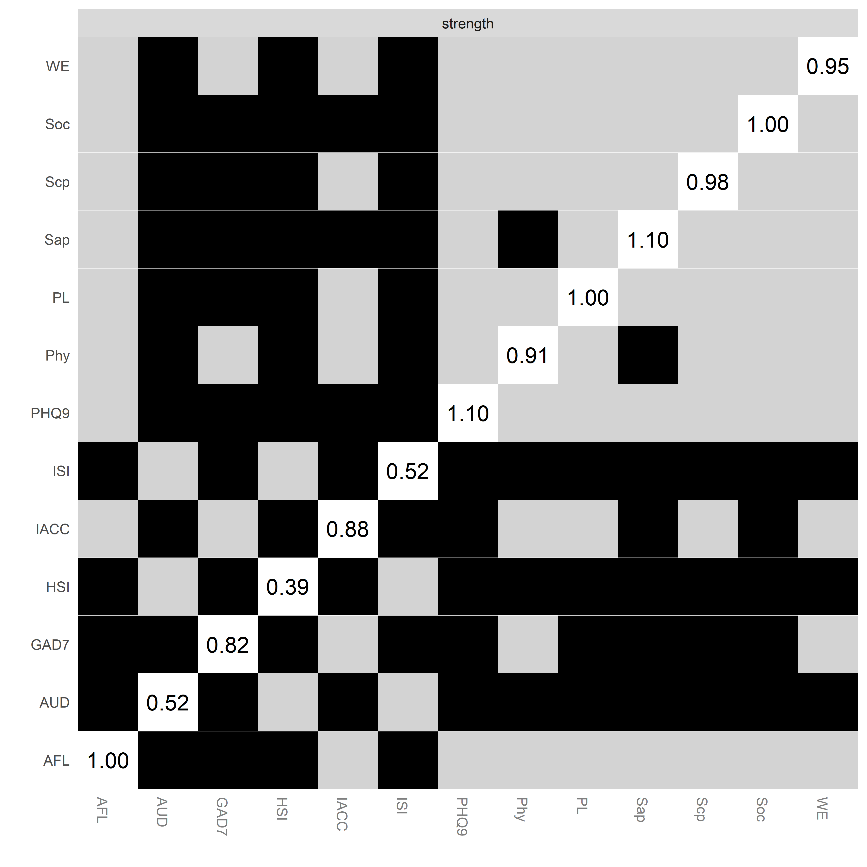
**

B

**Fig. S5. Bootstrapped difference tests of strength centrality in the networks**

(A) The non-depressive symptom (NDS) group. (B) The depressive symptom (DS) group. Black boxes indicate a significant difference between the strength centrality of two nodes (alpha = 0.05). Grey boxes indicate no significant difference.
